# Supplementary material for: TOX and CDKN2A/B Gene Polymorphisms Are Associated with Type 2 Diabetes in Han Chinese
Source: PubMed Central journal article supplement (PMC4650661; doi:10.1038/srep11900), 2015-07-03

# ***TOX* and *CDKN2A/B* Gene Polymorphisms Are Associated with Type 2 Diabetes in Han Chinese**

**Running title:** *TOX* and *CDKN2A/B* genes are associated with type 2 diabetes

Fengjiang Wei<sup>1\*</sup>, Chunyou Cai<sup>1\*</sup>, Shuzhi Feng<sup>2\*</sup>, Jia Lv<sup>1</sup>, Shen Li<sup>1</sup>, Baocheng Chang<sup>3</sup>,  
Hong Zhang<sup>4</sup>, Wentao Shi<sup>1</sup>, Hongling Han<sup>2</sup>, Chao Ling<sup>1</sup>, Ping Yu<sup>1</sup>, Yongjun Chen<sup>4</sup>,  
Ning Sun<sup>2</sup>, Jianli Tian<sup>2</sup>, Hongxiao Jiao<sup>1</sup>, Fuhua Yang<sup>1</sup>, Mingshan Li<sup>1</sup>, Yuhua Wang<sup>1</sup>,  
Lei Zou<sup>1</sup>, Long Su<sup>4</sup>, Jingbo Li<sup>5</sup>, Ran Li<sup>2</sup>, Huina Qiu<sup>5</sup>, Jingmin Shi<sup>1</sup>, Shiyong Liu<sup>2</sup>,  
Mingqin Chang<sup>1</sup>, Jingna Lin<sup>5†</sup>, Liming Chen<sup>3†</sup>, Wei-Dong Li<sup>1†</sup>

<sup>1</sup> Research Center of Basic Medical Sciences, Tianjin Medical University, Tianjin, 300070, China.

<sup>2</sup> Tianjin General Hospital, Tianjin Medical University, Tianjin, 300052, China

<sup>3</sup> Metabolic Diseases Hospital, Tianjin Medical University, Tianjin, 300070, China

<sup>4</sup> Eye Hospital, Tianjin Medical University, Tianjin, 300384, China

<sup>5</sup> Tianjin People's Hospital, Department of Endocrinology, Tianjin, 300191, China

\*These authors contributed equally to this manuscript

† *Corresponding author and person to whom reprint requests should be address to:*

Wei-Dong Li, M.D., Ph.D.

Email: [liweidong98@tjmu.edu.cn](mailto:liweidong98@tjmu.edu.cn)

Tel: 86-22-83336586

Fax: 86-22-23542775

Liming Chen, M.D.

Email: [xfx22081@vip.163.com](mailto:xfx22081@vip.163.com)

Tel: 86-22-23333266

Fax: 86-22-23333269

Jingna Lin, M.D.

Email: [linjingna6@yahoo.com](mailto:linjingna6@yahoo.com)

Tel: 86-22-2755-7477

Fax: 86-22-2755-7477

Wei, et al. *TOX* and *CDKN2A/B* Gene Polymorphisms Are Associated with Type 2 Diabetes in Han Chinese

**Supplement Table 1** Power calculations for T2DM candidate genes in 1939 cases and 918 controls\*

| SNP        | Gene          | Chr | MAF   | GRR=1.2 |       |       | GRR=1.4 |       |       | GRR=1.6 |       |       | GRR=1.8 |       |       |
|------------|---------------|-----|-------|---------|-------|-------|---------|-------|-------|---------|-------|-------|---------|-------|-------|
|            |               |     |       | 0.05    | 0.01  | 0.001 | 0.05    | 0.01  | 0.001 | 0.05    | 0.01  | 0.001 | 0.05    | 0.01  | 0.001 |
| rs7578326  | <i>IRS1</i>   | 2   | 0.146 | 0.346   | 0.155 | 0.042 | 0.814   | 0.609 | 0.331 | 0.976   | 0.914 | 0.743 | 0.998   | 0.989 | 0.943 |
| rs7903146  | <i>TCF7L2</i> | 10  | 0.046 | 0.111   | 0.032 | 0.005 | 0.258   | 0.103 | 0.023 | 0.435   | 0.217 | 0.067 | 0.597   | 0.355 | 0.139 |
| rs2237892  | <i>KCNQ1</i>  | 11  | 0.275 | 0.479   | 0.252 | 0.083 | 0.942   | 0.831 | 0.596 | 0.998   | 0.991 | 0.951 | 1       | 1     | 0.998 |
| rs17818920 | <i>FTO</i>    | 16  | 0.130 | 0.257   | 0.102 | 0.023 | 0.662   | 0.422 | 0.181 | 0.907   | 0.760 | 0.497 | 0.982   | 0.930 | 0.777 |
| rs1876942  | <i>FTO</i>    | 16  | 0.441 | 0.237   | 0.091 | 0.020 | 0.634   | 0.401 | 0.167 | 0.907   | 0.761 | 0.498 | 0.985   | 0.941 | 0.803 |
| rs708254   | <i>FTO</i>    | 16  | 0.444 | 0.234   | 0.089 | 0.020 | 0.636   | 0.394 | 0.163 | 0.903   | 0.753 | 0.488 | 0.984   | 0.938 | 0.794 |

\* Power calculations for T2DM candidate genes were carried out by Genetic Power Calculator (GPC). High risk allele frequency was set equal to 0.25, prevalence=0.1, dominant model, Genotype relative risks were set as 1.2, 1.4, 1.6, and 1.8, respectively.  $D'=0.9$ , type I error rates were 0.05, 0.01, and 0.001, respectively.

**Supplement Table 2** Linkage disequilibrium among candidate gene SNPs

| SNP        | chromosome | bp        | gene   | SNP1       | SNP2       | D'    | r <sup>2</sup> |
|------------|------------|-----------|--------|------------|------------|-------|----------------|
| rs62183937 | 2          | 204193688 | ABI2   | rs62183937 | rs11675251 | 1     | 0.444          |
| rs11675251 | 2          | 204249399 | ABI2   | rs62183937 | rs3731652  | 1     | 0.742          |
| rs3731652  | 2          | 204261723 | ABI2   | rs62183937 | rs1376877  | 0.995 | 0.431          |
| rs1376877  | 2          | 204272090 | ABI2   | rs11675251 | rs3731652  | 1     | 0.597          |
|            |            |           |        | rs11675251 | rs1376877  | 0.997 | 0.974          |
|            |            |           |        | rs3731652  | rs1376877  | 0.995 | 0.581          |
| rs4353     | 17         | 61570422  | ACE    | rs4353     | rs11868324 | 0.645 | 0.126          |
| rs11868324 | 17         | 61577309  | ACE    |            |            |       |                |
| rs10946398 | 6          | 20661034  | CDKAL1 | rs10946398 | rs7756992  | 0.837 | 0.534          |
| rs7756992  | 6          | 20679709  | CDKAL1 |            |            |       |                |
| rs2239359  | 16         | 89849480  | FANCA  | rs2239359  | rs7190823  | 0.36  | 0.001          |
| rs7190823  | 16         | 89866043  | FANCA  |            |            |       |                |
| rs1876942  | 16         | 54118435  | FTO    | rs1876942  | rs708254   | 0.985 | 0.957          |
| rs708254   | 16         | 54123389  | FTO    |            |            |       |                |
| rs35747495 | 3          | 20077262  | KAT2B  | rs35747495 | rs1986917  | 0.024 | 0              |
| rs1986917  | 3          | 20118522  | KAT2B  |            |            |       |                |
| rs735853   | 22         | 36679215  | MYH9   | rs735853   | rs875726   | 0.836 | 0.279          |
| rs875726   | 22         | 36691969  | MYH9   | rs735853   | rs2009930  | 0.836 | 0.278          |
| rs2009930  | 22         | 36699306  | MYH9   | rs735853   | rs2239782  | 0.764 | 0.225          |
| rs2239782  | 22         | 36705104  | MYH9   | rs735853   | rs3752462  | 0.779 | 0.25           |
| rs3752462  | 22         | 36710183  | MYH9   | rs735853   | rs2269532  | 0.191 | 0.02           |
| rs2269532  | 22         | 36718039  | MYH9   | rs735853   | rs2071731  | 0.191 | 0.02           |
| rs2071731  | 22         | 36718858  | MYH9   | rs735853   | rs739097   | 0.156 | 0.015          |
| rs739097   | 22         | 36746079  | MYH9   | rs875726   | rs2009930  | 0.997 | 0.99           |
|            |            |           |        | rs875726   | rs2239782  | 0.739 | 0.529          |
|            |            |           |        | rs875726   | rs3752462  | 0.978 | 0.928          |
|            |            |           |        | rs875726   | rs2269532  | 0.512 | 0.192          |
|            |            |           |        | rs875726   | rs2071731  | 0.513 | 0.193          |
|            |            |           |        | rs875726   | rs739097   | 0.544 | 0.19           |
|            |            |           |        | rs2009930  | rs2239782  | 0.736 | 0.527          |
|            |            |           |        | rs2009930  | rs3752462  | 0.982 | 0.931          |
|            |            |           |        | rs2009930  | rs2269532  | 0.517 | 0.195          |
|            |            |           |        | rs2009930  | rs2071731  | 0.518 | 0.196          |
|            |            |           |        | rs2009930  | rs739097   | 0.549 | 0.193          |

|            |    |           |         |            |            |       |       |
|------------|----|-----------|---------|------------|------------|-------|-------|
|            |    |           |         | rs2239782  | rs3752462  | 0.763 | 0.546 |
|            |    |           |         | rs2239782  | rs2269532  | 0.515 | 0.188 |
|            |    |           |         | rs2239782  | rs2071731  | 0.515 | 0.189 |
|            |    |           |         | rs2239782  | rs739097   | 0.535 | 0.178 |
|            |    |           |         | rs3752462  | rs2269532  | 0.531 | 0.213 |
|            |    |           |         | rs3752462  | rs2071731  | 0.532 | 0.214 |
|            |    |           |         | rs3752462  | rs739097   | 0.57  | 0.215 |
|            |    |           |         | rs2269532  | rs2071731  | 1     | 1     |
|            |    |           |         | rs2269532  | rs739097   | 0.986 | 0.85  |
|            |    |           |         | rs2071731  | rs739097   | 0.986 | 0.85  |
| rs6427665  | 1  | 162214762 | NOS1AP  | rs6427665  | rs2661812  | 0.308 | 0.081 |
| rs2661812  | 1  | 162281295 | NOS1AP  |            |            |       |       |
| rs7805834  | 7  | 151043272 | NUB1    | rs7805834  | rs446886   | 1     | 0.898 |
| rs446886   | 7  | 151053043 | NUB1    | rs7805834  | rs386956   | 0.98  | 0.116 |
| rs386956   | 7  | 151064064 | NUB1    | rs446886   | rs386956   | 0.982 | 0.129 |
| rs5749286  | 22 | 31900359  | SFI1    | rs5749286  | rs5753669  | 0.997 | 0.995 |
| rs5753669  | 22 | 31905819  | SFI1    | rs5749286  | rs2295251  | 0.661 | 0.203 |
| rs2295251  | 22 | 32013265  | SFI1    | rs5753669  | rs2295251  | 0.658 | 0.197 |
| rs13129697 | 4  | 9926967   | SLC2A9  | rs13129697 | rs7660895  | 0.733 | 0.519 |
| rs7660895  | 4  | 9985445   | SLC2A9  | rs13129697 | rs1014290  | 0.93  | 0.645 |
| rs1014290  | 4  | 10001861  | SLC2A9  | rs7660895  | rs1014290  | 0.94  | 0.661 |
| rs371276   | 13 | 89830501  | SLITRK5 | rs371276   | rs409762   | 1     | 0.992 |
| rs409762   | 13 | 89840239  | SLITRK5 |            |            |       |       |
| rs1498506  | 15 | 67367634  | SMAD3   | rs1498506  | rs12102171 | 0.338 | 0.04  |
| rs12102171 | 15 | 67425033  | SMAD3   |            |            |       |       |
| rs11067076 | 12 | 114799863 | TBX5    | rs11067076 | rs11067083 | 1     | 0.826 |
| rs11067083 | 12 | 114811042 | TBX5    |            |            |       |       |
| rs1526167  | 8  | 59702355  | TOX     | rs1526167  | rs2726557  | 0.037 | 0.001 |
| rs2726557  | 8  | 59792800  | TOX     | rs1526167  | rs11777927 | 0.011 | 0     |
| rs11777927 | 8  | 59881039  | TOX     | rs1526167  | rs17304270 | 0.013 | 0     |
| rs17304270 | 8  | 59979034  | TOX     | rs2726557  | rs11777927 | 0.244 | 0.05  |
|            |    |           |         | rs2726557  | rs17304270 | 0.498 | 0.012 |
|            |    |           |         | rs11777927 | rs17304270 | 0.38  | 0.006 |

D' and r2 were calculated by Haploview

**Supplement Figure 1** Linkage disequilibrium (LD) patterns ( $r^2$ ) of the *TOX* gene region SNPs, Chinese (CHB)

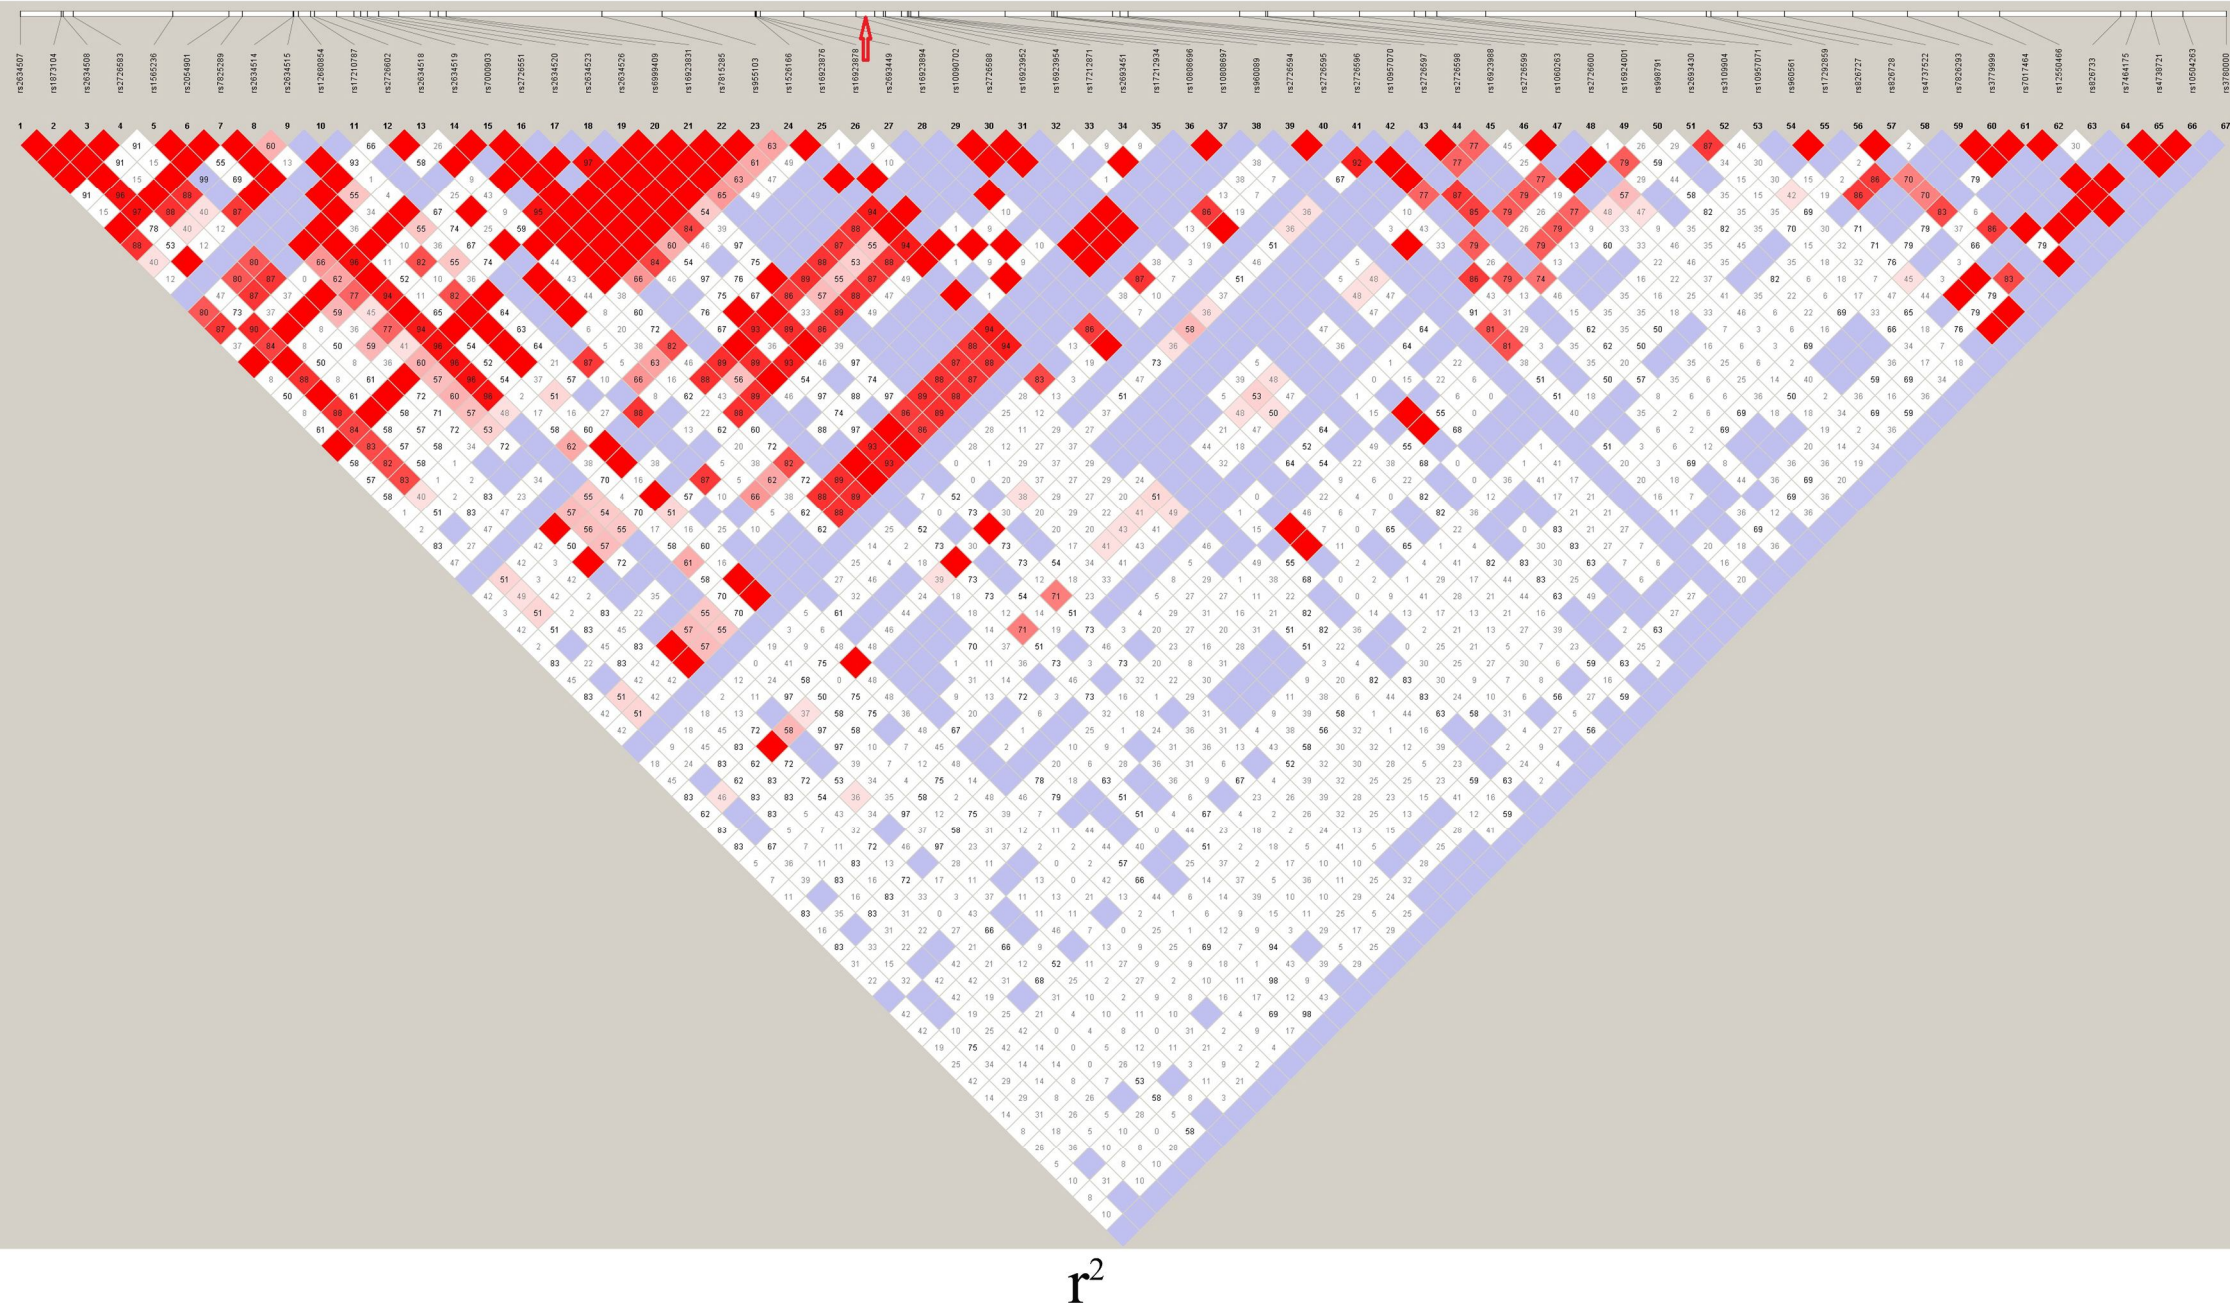



**Supplement Figure 2** Linkage disequilibrium (LD) patterns ( $r^2$ ) of the *TOX* gene region SNPs (Caucasians, CEU)

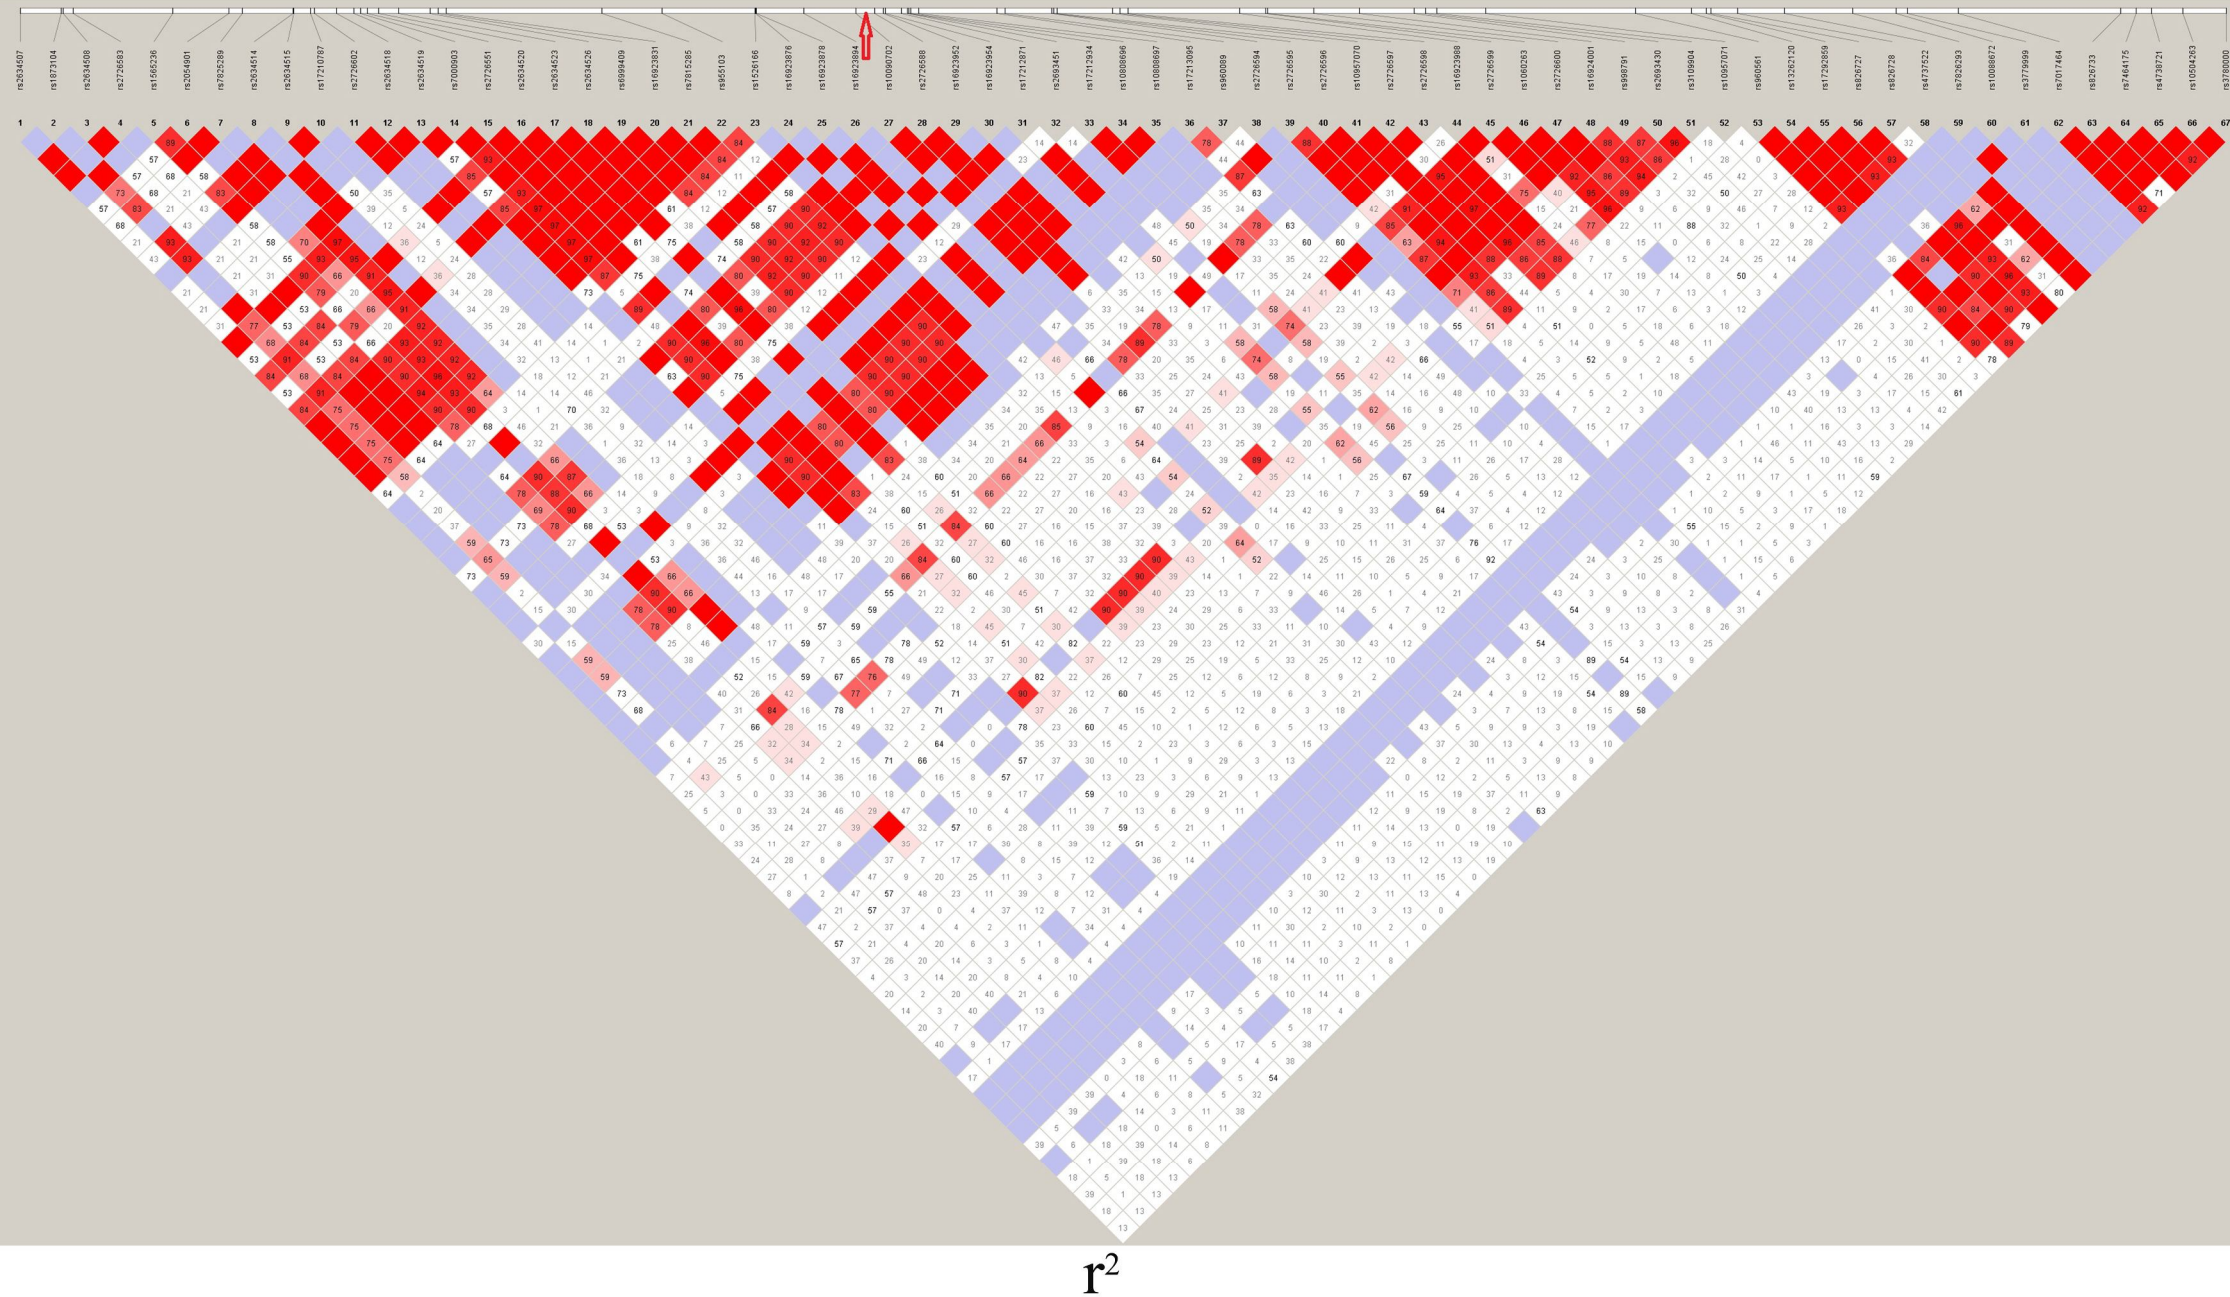

Supplement: srep11900-s1.pdf [file srep11900-s1.pdf]
